# Supplementary material for: Allergen Microarrays for In Vitro Diagnostics of Allergies: Comparison with ImmunoCAP and AdvanSure
Source: PubMed Central journal article supplement — Ann Lab Med. 2018 Mar 30;38(4):338–47. doi: 10.3343/alm.2018.38.4.338 (PMC5895863; doi:10.3343/alm.2018.38.4.338), 2018-03-30
Supplement: alm-38-338-s001.pdf [file alm-38-338-s001.pdf]

**Supplemental Data Table S1.** Assay sensitivity of detection *D. pteronyssinus*- and *D. farinae*-specific IgE in the serum pool using the GOLD chip

| Allergen                | Serial dilution |        |        |        |        |        |         |         |         |
|-------------------------|-----------------|--------|--------|--------|--------|--------|---------|---------|---------|
|                         | 1/2 ×           | 1/4 ×  | 1/8 ×  | 1/16 × | 1/32 × | 1/64 × | 1/128 × | 1/256 × | 1/512 × |
| <i>D. pteronyssinus</i> | 15,936          | 11,096 | 5,609  | 3,091  | 1,730  | 771    | 447     | 409     | 231     |
| <i>D. farinae</i>       | 38,656          | 25,806 | 14,318 | 7,076  | 3,936  | 2,253  | 1,047   | 855     | 487     |
